# Supplementary material
Source: HighWire-hosted journal article supplement (https://www.genetics.org/content/suppl/2015/06/18/genetics.115.178616)
Supplement: TableS1.pdf [file TableS1.pdf]

**Table S1** Magnitude of correlation of PC loadings for three 'supersets'.

| <b>PC</b> | <b>Set1-Set2 correlation</b> | <b>Set1-Set3 correlation</b> | <b>Set2-Set3 correlation</b> |
|-----------|------------------------------|------------------------------|------------------------------|
| 1         | 0.981                        | 0.979                        | 0.980                        |
| 2         | 0.876                        | 0.853                        | 0.856                        |
| 3         | 0.850                        | 0.816                        | 0.809                        |
| 4         | 0.766                        | 0.776                        | 0.752                        |
| 5         | 0.658                        | 0.654                        | 0.639                        |
| 6         | 0.605                        | 0.604                        | 0.592                        |
| 7         | 0.001                        | 0.001                        | 0.210                        |
| 8         | 0.043                        | 0.179                        | 0.045                        |
| 9         | 0.312                        | 0.068                        | 0.089                        |
| 10        | 0.007                        | 0.067                        | 0.201                        |
