# Supplementary material
Source: HighWire-hosted journal article supplement (https://www.genetics.org/content/suppl/2015/06/18/genetics.115.178616)
Supplement: TableS5.pdf [file TableS5.pdf]

**Table S5 Individual ancestral admixture proportions for subjects run on the LAT array.**

| <b>Nationality</b>     | <b>Ancestral admixture proportion (%)</b> |             |                 |
|------------------------|-------------------------------------------|-------------|-----------------|
|                        | African                                   | European    | Native American |
| Mexican                | 2.3 ± 5.0                                 | 67.0 ± 14.5 | 30.7 ± 13.5     |
| Central-South American | 5.5 ± 10.8                                | 65.4 ± 17.9 | 29.1 ± 16.3     |
| Puerto-Rican           | 12.3 ± 14.1                               | 75.5 ± 14.8 | 12.4 ± 7.6      |
| Cuban                  | 12.7 ± 20.5                               | 79.7 ± 20.0 | 7.6 ± 8.1       |
| LAT mean               | 4.4 ± 7.9                                 | 66.5 ± 15.8 | 28.6 ± 14.8     |
